# Supplementary material for: Enhancing Transparency and Trust in Brain Tumor Diagnosis: An In-Depth Analysis of Deep Learning and Explainable AI Techniques
Source: Research Square preprint supplement (doi:10.21203/rs.3.rs-5882298/v1), 2025-01-30
Supplement: Supplementary file 1 [file a17832e9158676008bd030ea.xlsx]

## Sheet: Complete review
Sr.No	Study	Year	Journal Name	Indexing/IF	Code Available	Imaging Modality	ML/DL/TF	XAI	Task	Function Used			Results	Findings	Dataset	limitations	Review
										Optimizer	Loss Function	Activation Function
1	Selvaraju et al.,[55]	2017	IEEEXplore		YES	MRI	CNN	Grad Cam	Detection	Not specified	Not specified	ReLU	Human studies showed that Grad-CAM visualizations are more class-discriminative than previous techniques, improving human performance by 16.79% compared to other methods like Guided Backpropagation .	1.Grad-CAM successfully provides class-discriminative visualizations. Grad-CAM outperforms previous 2.Visualization methods like Guided Backpropagation and Deconvolution. Guided Grad-CAM Provides High-Resolution Visualizations.	PASCAL VOC 2007 and ImageNet	1.Grad-CAM relies on the gradients flowing into the last convolutional layer of a CNN. 2.Limited to CNN only.	Grad-CAM, a technique proposed by Selvaraju et al.[52], that generates visual explanations for CNN-based models by highlighting important image regions based on gradient flow to the final convolutional layer. Combined with fine-grained visualizations in Guided Grad-CAM, it enhances model transparency, pinpoints failure modes, and facilitates generalization by drawing attention to dataset biases.
2	Pereira et al., [56]	2018	Lecture Notes in Computer Science		YES	MRI	CNN	Grad Cam	Classification	Adam	Cross-entropy	ReLU	The model achieves high accuracy (92.98%) for tumor ROI-based grading and integrates Grad-CAM and Guided Backpropagation to ensure interpretability.	1.High Accuracy for Tumor ROI-based Grading. 2.The integration GBP and Grad-CAM allowed for the visualization of regions contributing to model predictions. 3.The findings suggest that CNNs can provide a fast, non-invasive approach for glioma grading from MRI data	BRATS 2017	1.The model's performance is highly reliant on the availability of well-annotated MRI datasets. 2.Limited genelaizability. 3.Risk of overfitting due to the small size of the dataset used for training.	The Pereira et al.[53 ] proposes a method for glioma grading using 3D CNNs, eliminating the need for manual region-of-interest definition. In order to ensure interpretability, the model integrates Guided Backpropagation with Grad-CAM and achieves high accuracy (92.98%) for tumor ROI-based grading.
3	Lee et al.,[57]	2018	Archive.org		NO	MRI	CNN	PG CAM	Detection	Adam	Softmax	ReLU	The PG-CAM model achieved 95.6% classification accuracy .	1.The proposed Pyramid Grad-CAM (PG-CAM) significantly improved tumor localization compared to traditional Grad-CAM methods. 2.By using a DC-FPN, PG-CAM was able to integrate multi-scale features, resulting in better tumor detection across various scales.	image dataset of 550 patients.	1.Precision and accuracy for tumor localization are still relatively low. 2.The model relies on weakly supervised learning using image-level annotations rather than pixel-wise. 3.The dataset used for training has a high class imbalance.	A new technique for weakly supervised tumor localization called PG-CAM was proposed by Lee et al.,[54]. To capture multi-scale tumor features, PG-CAM employs a densely connected encoder-decoder feature pyramid network. In validation, PG-CAM demonstrated a 23% higher localization accuracy than Grad-CAM when tested on meningioma MR data.
4	Ahmad et al.,[58]	2019	IEEEXplore		No	T2 Weighted MRI	DL-CNN	CAM	Detection and classification	Adam	Categorical cross entropy	ReLU	The ResNet architecture achieved an accuracy of 86.7% .	1.The study successfully demonstrated that IDH genotype classification in gliomas. 2.The DL-CNN model, based on ResNet architecture, achieved high test accuracy.	41 subjects with IDH1 mutant genotype and 30 subjects with wild-type IDH1 genotype	1.Dependence on T2-weighted MRI. 2.Limited sample size. 3.The author did not mention external validation on independent datasets.	Based on ResNet architecture and Cam Ahmad et al.,[55] developed DL-CNN method that achieved an accuracy of 86.7% . The DL-CNN model effectively distinguished high-grade gliomas with IDH1 mutation from wild-type cases, yielding patient-specific activation maps that highlighted the tumoral area in mutant cases and peri-tumoral edema in wild-type cases.
5	Nateka et al.,[59]	2020	Frontiers in Computational Neuroscience	SCIE IF 2.1 Scopus Cite Score 5.3	NO	MRI	SimUnet, ResNet,DenseUnit With Grad Cam	Grad Cam	Segmentation	Not specified	Not specified	Not specified	Dice scores for whole tumor, tumor core, and enhancing tumor on Brats 2018. DenseUnet: WT (0.830), TC (0.760), ET (0.685) ResUnet: WT (0.788), TC (0.734), ET (0.649) SimUnet: WT (0.743), TC (0.693), ET (0.523)	1.The study shows that brain tumor segmentation models follow a hierarchical, top-down approach to localization. 2.The models learned human-understandable, disentangled concepts at a filter level. 3.The study was able to generate visualizations of the internal representations within the network.	BRATS 2018	1.Validation thorugh additional dataset is required. 2.Limited generalizability. 3.The study focuses on 2D models due to the challenge of analyzing and visualizing interpretability metrics in 3D models.	The interpretability and uncertainty analysis of deep learning models for brain tumor segmentation are investigated by Natekar et al., [56].It demonstrates that models learn hierarchical, human-understandable features, such as tumor regions, and skip connections aid in faster localization.Uncertainty maps highlight misclassified regions, making them useful for clinical review.
6	Pintelas et al.,[60]	2020	Journal of Imaging	ESCI IF 2.7 Scopus Cite Score 5.8	NO	MRI	DT,NB,LR,NN,SVM,KNN	Grad-CAM	Classification	Not specified	Not specified	Not specified	Best classification accuracy (98%) is obtained with LR1.	1.The proposed framework successfully combines interpretability and accuracy, providing clear, human-understandable explanations for its predictions. 2.The model relies on high-level texture and contour features derived from traditional image processing techniques.	Dataset of 3064 head images with glioma, meningioma, and pituitary tumors.	1.The success of the framework relies heavily on the feature extraction process. 2.Trade-off between Accuracy and Interpretability. 3.Limited Generalizability.	The Pintelas et al.,[57] implemented the DT,NB,LR,NN,SVM and KNN machine learning models on dataset of 3064 images with glioma, meningioma and pituitary tumors. The best results were obtained with LR and NN for tumor classification. Based on results comparative analysis is made between White box models and black box models.
7	Windisch et al.,[61]	2020	Neuroradiology .	SCIE IF 2.6	YES	MRI T1-weighted, T2-weighted	Resnet50, and Bayesian neural network	Grad-CAM	Detection	Not specified	Not specified	Not specified	The model achieved a categorical accuracy of 93%.	1.Improved Accuracy with Explainability. 2.Benefit of Early Explainability. 3.By refining the dataset, the model’s predictions improved. 4.Explainability features such as Grad-CAM are crucial for helping physicians trust and integrate AI predictions into clinical decision-making.	TCGA-GBM	1.The model showed a tendency to focus on irrelevant areas. 2.The MRI data used for training came from different views and acquisition sequences. 3.Limited Generalizability.	The Windisch et al.,[58] explores the integration of explainability features in a CNN-based model for brain tumor detection using MRI scans. Early implementation of tools like Grad-CAM helped identify biases, such as the model focusing on bone defects instead of tumors, and guided improvements in accuracy.
8	Esmaeili et al.,[62]	2021	Journal of Personalized Medicine	SCIE IF 3 Scopus Cite Score 5	YES	MRI T1-weighted, T2-weighted, and FLAIR	DenseNet-121, GoogLeNet, and MobileNet,	Grad-CAM	Detection	Adam	Not specified	Not specified	DenseNet-121 achieved the highest classification (92.1%) and localization accuracy (81.1% hits and 79.1% IoU.	1.Grad-CAM method effectively visualized the model’s performance, highlighting relevant brain tumor regions. 2.The study found a significant correlation between classification accuracy and tumor localization performance.	TCGA CIA	1.A significant number of tumor brains were incorrectly classified. 2.Grad-CAM struggled with complex images containing multiple objects. 3.The study used limited patient data.	The Esmaeili et al., [59] evaluates the use of explainable AI (Grad-CAM) for brain tumor localization in MRI images using three deep learning models: DenseNet-121, GoogLeNet, and MobileNet. DenseNet-121 achieved the highest classification accuracy (92.1%) and localization accuracy (81.1%). The explainability provided by Grad-CAM helped visualize model performance and identify false positives.
9	Saleem et al.,[ 63]	2021	Computers in Biology and Medicine	SCIE IF 7 Scopus Cite Score 11.9	NO	MRI T1-weighted, T2-weighted , FLAIR, and T1ce	DMFNet,Guided Backpropagation (GB)	Grad-CAM	Segmentation	Not specified	Dice loss	ReLU	1.The model achieved better segmentation accuracy when interpreting the MRI sequences. 2.The proposed gradient-free technique outperformed traditional methods.	1.The model learns tumor localization by first capturing the background and then focusing on the tumor regions. 2.T1ce was most significant for detecting enhancing tumor regions, while FLAIR was essential for identifying edema, and T2 performed best in segmenting non-enhancing tumor regions	BraTS-2018	1.The model sometimes failed to predict specific tumor regions. 2.Limited generalizability. 3.The T1-weighted sequence was found to be the least useful in tumor segmentation compared to FLAIR, T1ce, and T2 sequences	The Saleem et al.,[60] improved 3D brain tumor segmentation by using a gradient-free interpretability method, outperforming previous gradient-based approaches like Grad-CAM. It highlighted the varying significance of MRI sequences (T1ce, FLAIR, and T2) for different tumor regions and identified model failure modes.
10	Jin et al.,[64]	2022	The Thirty-Sixth AAAI Conference on Artificial Intelligence		YES	MRI T1-weighted, T2-weighted , FLAIR, and T1ce	CNN,	Grad Cam and SHAP	Classification	Not specified	Not specified	Not specified	1.The 16 examined heatmap algorithms failed to meet clinical requirements for indicating the AI model’s decision process or quality.	1.Physicians who participated in the user study exhibited low inter-rater reliability when assessing the explanations generated by the XAI algorithms. 2.The evaluated XAI algorithms failed to faithfully represent the AI models’ internal decision-making processes. 3.The researchers proposed a new metric, MSFI, to assess how well the XAI methods localize important features in modality-specific cont…	BraTS 2020	1.Current XAI Algorithms Are Not Clinically Designed. 2.Most XAI algorithms struggle to highlight the importance of different imaging modalities, such as T1, T2, or FLAIR.	The Jin et al.,[61 ] employed 16 XAI methods with CNN for brain tumor classification using multimodel MRI BraTS2000 dataset. The Modality-Specific Feature Importance (MSFI) metric was introduced to address challenges in explaining multi-modal medical images.After evaluating the result it is showed that exisitng XAI algorithms did not meet clinical requirement.
11	Zeineldin et al.,[65]	2022	International Journal of Computer Assisted Radiology and Surgery	SCIE IF 3.1 Scopus Cite Score 5.9	YES	MRI native T1W, Gadolinium T1Gd, T2W, and FLAIR	ResNet-50,3D DeepSeg,Vanilla gradient, guided backpropagation,	Integrated gradients, Guided integrated gradients, SmoothGrad, Grad-CAM, and guided Grad-CAM.	Segmentation and Classification	Adam	Not specified	Not specified	1.ResNet 50 achieved a classification accuracy of 98.62% for brain glioma grading. 2.For BT segmentation, the model achieved Dice scores of 84.10 (enhancing tumor), 87.33 (tumor core), and 92.00 (whole tumor).	1.The study evaluates several state-of-the-art XAI techniques for MRI brain tumor classification and segmentation. 2.SmoothGrad performed the best in terms of generating high-resolution feature maps that clearly identify the most relevant regions of the MRI images.	BraTS 2019 and 2021	1.Lack of Interpretability in Deep Learning Models. 2.Current explainability methods struggle to effectively interpret complex multi-modal MRI data. 3.Many existing XAI methods are focused on 2D MRI slices.	The Zeineldin et al.,[ 62] proposed NeuroXAI framework makes a valuable contribution by integrating multiple XAI methods and allowing for visualization of both 2D and 3D medical imaging data. This framework offers interpretability for both classification and segmentation tasks, helping medical professionals better understand DL model behavior.
12	Gaur et al.,[66]	2022	Frontiers in Genetics	SCIE IF 2.8 Scopus Cite Score 5.5	NO	MRI	CNN	LIME,SHAP	Detection	Adam	Not specified	ReLU	The CNN model achieved 94.64% training accuracy and 85.37% validation accuracy.	1.The model achieved a classification accuracy of 94.64%, outperforming several state-of-the-art models. 2.The inclusion of SHAP and LIME in the model allowed for detailed explanation. 3.The CNN model demonstrated robustness in distinguishing between different tumor subtypes.	Kaggle:sartajbhuvaji	1.The proposed dual-input CNN model faces challenges when dealing with low-quality MRI images. 2.Limited generalizability.	The Gaur et al., 63 ] successfully demonstrated that combining CNN with explanation-driven methods like SHAP and LIME improves both accuracy and interpretability, essential for clinical application.
13	Dasanayaka et al., [67]	2022	Software Impacts	SCIE IF 1.3 Scopus Cite Score 2.7	YES	MRI and WSI	DenseNet, ResNet	Grad-Cam	Classification	Not specified	Not specified	Not specified	The proposed method achieved an accuracy of 86% during classification.	1.A web-based tool that classifies brain tumors into three categories using MRI and WSI data, combining DenseNet for MRI and ResNet for WSI. 2.The tool replicates real-world diagnostic procedures by combining MRI segmentation, MRI classification, and WSI classification into an integrated platform.	MRI sequences and WSI	1.Source of dataset is not mentioned. 2.Limited generalizability. 3.The tool currently supports a limited number of imaging modalities.	The Dasanayaka et al.,[ 64] developed the Tumour-Analyser tool that provides an interpretable AI solution for brain tumor classification using MRI and WSI data, combining DenseNet and ResNet models. It effectively addresses the black-box nature of deep learning by offering visual explanations via Grad-CAM and attention mechanisms. With an 86% accuracy in MRI classification, the tool enhances diag…
14	Maqsood et al.,[68]	2022	Medicina .	SCIE IF 2.4 Scopus Cite Score 3.5	No	MRI	MobileNetV2, Multiclass SVM	Grad Cam	Detection	Adam	Cross-entropy	ReLU	The proposed method achieves remarkable results with high accuracy 97.47% for BraTS 2018 and 98.92% for Figshare	1.The proposed model integrates deep neural networks and multiclass SVM. 2.It uses a custom 17-layer CNN architecture for segmentation and MobileNetV2 for feature extraction. 3.The model also implements XAI to visualize decision-making, enhancing transparency.	Figshare and BraTS 2018	1.Time-consuming feature selection method. 2.The approach was only tested on 2D MRI images. 3.High computational resources are required for processing.	The Maqsood et al., [65] introduces a powerful model combining CNN and M-SVM for brain tumor detection using MRI. The integration of deep learning and transfer learning enhances both segmentation and classification, achieving high accuracy. The model’s XAI implementation adds interpretability, helping users visualize tumor locations.T
15	Marmolejo-Saucedo et al., [69]	2022	Mobile Networks and Applications	SCIE IF 2.6 Scopus Cite Score 9.5	No	MRI T1-weighted, T2-weighted , FLAIR, and T1ce	CNN	numGrad Cam	Detection and classification	Not specified	Not specified	ReLU	The proposed model achieved an accuracy of 97.11%, sensitivity of 95.58%, and specificity of 96.81%.	1.Compared to traditional Grad-CAM, the numGrad-CAM method improves the interpretability of the CNN model. 2.In evaluations by 15 physicians, the numGrad-CAM-CNN model was positively rated for its explainability.	BRATS 2017 .	1.Limited generalizability. 2.There is a need for further validation. 3.The model requires significant computational resources.	The Marmolejo et al.,[66] proposed numGrad-CAM CNN model demonstrated strong performance in brain tumor diagnosis using MRI images, with a classification accuracy of 97.11%, outperforming traditional Grad-CAM methods. Human-side evaluations by 15 physicians showed that the heatmaps generated by numGrad-CAM successfully highlighted tumor regions, with an average score of 5.8 out of 6 for its expla…
16	Hussain et al., [70 ]	2023	Information	ESCI IF 2.6 Scopus Cite Score 5.5	No	MRI	VGG-19, scratch VGG-19,	CAM, Grad-CAM, and Grad-CAM++	Detection and classification	Not specified	Not specified	Not specified	Pre-trained VGG-19 achieved the highest accuracy 99.92% for multi-class classification, 99.85% for binary-class and best explainability using Grad-CAM and Grad-CAM++.	1.Pre-trained VGG-19 model with Grad-CAM produced the best performance for brain tumor classification and localization. 2.Grad-CAM++ provided more refined visual explanations, improving interpretability. 3.The use of heatmaps greatly assisted in explaining model predictions, aiding clinical decisions.	Kaggle:Brain MRI Images for Brain Tumor Detection Kaggle:Brain Tumor Classification	1.Extensive computational resources and time is required. 2.Pre-trained models rely heavily on external datasets like ImageNet for transfer learning. 3.	The Hussain et al.,[67]uses pre-trained VGG-19, scratch VGG-19, and EfficientNet with CAM, Grad-CAM, and Grad-CAM++ to enhance brain tumor diagnosis. Pre-trained VGG-19 with Grad-CAM outperforms other models, achieving 99.85% accuracy, 98.59% precision, and 99.32% recall, improving classification and reducing diagnostic uncertainty.
17	Rahman et al., [71]	2023	IEEEXplore		No	MRI	lightweight CNN with Grad-CAM	Grad-CAM	Detection	Adam	Categorical cross entropy	ReLU	The proposed NeuroXAI++ model achieved high accuracy, precision, recall, and f1-score of 99.71%, 99.53%, 99.60%, and 99.57% respectively.	1.By integrating CNN with Grad-CAM, the model accurately localizes the position and size of brain cancer, enhancing diagnosis. 2.The proposed model is lightweight and reduces complexity while maintaining high performance.	Figshare	1.Validation thorugh additional dataset is required. 2.Limited generalizability. 3.Dependence on MRI Imaging.	The Rahman et al.,[68] proposed NeuroXAI++ model that presents an efficient method for brain cancer detection and localization using MRI images, combining CNN with Grad-CAM for explainability. With high accuracy and a lightweight architecture, it surpasses existing models in both detection precision and interpretability. By providing tumor localization insights, it aids in personalized treatment …
18	Yang et al.,[72]	2023	Medical Physics	SCIE IF 3.2 Scopus Cite Score 6.8	NO	MRI T1-weighted, T2-weighted , FLAIR, and T1ce	Neural ODE, U-Net and Cascaded U-Net	Neural Ordinary Differential Equation (ODE) model	Segmentation	Adam	Not specified	Sigmoid	The proposed model achieved accuracy across all segmentation tasks: ET (99.649%), TC (99.425%), and WT (99.383%).	1.The Neural ODE model enhances the explainability of deep neural networks for glioma segmentation by visualizing the image dynamics during segmentation. 2.T1-Ce MRI modality played a key role in segmenting enhancing tumors (ET) and tumor cores (TC), while FLAIR and T2 were crucial for whole tumor (WT) segmentation.	BraTS 2020	1.Validation thorugh additional dataset is required. 2.Limited generalizability. 3.Model requires significant computational resources. 4.The model is based on 2D MRI slices rather than full 3D volumes.	The Yang et al.,[69]introduces a Neural ODE model to visualize and explain deep learning behavior in glioma segmentation using multi-parametric MRI. It identifies key MRI modalities—T1-Ce for enhancing tumors and FLAIR/T2 for whole tumors—while maintaining high accuracy with reduced inputs. The model optimizes data use without significant performance loss, enhancing its explainability.
19	Ahmed et al.,[73]	2023	IEEEXplore		NO	MRI	EfficientNetB0	LIME and SHAP	Classification	Not specified	Not specified	Not specified	The proposed model achieved an accuracy of 99.84% for brain tumor detection and classification.	1.The research presents an explanation-driven Deep Learning model for brain tumor detection and classification using an EfficientNetB0 CNN, achieved 99.84% accuracy both visually and numerically. 2.It emphasizes model interpretability through SHAP explanations. 3.SHAP insights illustrate how each input attribute influences the model's output.	Kaggle:Brain MRI Images for Brain Tumor Detection	1.Validation through addditional dataset is required. 2.Limited generalizability. 3.The model focuses solely on MRI images. 4. Further experimentation on multi-modal MRI-guided neurosurgery	The Ahmed et al.,[70] presents an innovative deep learning model for brain tumor classification, combining EfficientNetB0 CNN with SHAP explainability. Achieving a remarkable accuracy of 99.84%, the model outperforms previous approaches both visually and numerically. The integration of SHAP enhances interpretability, making the model highly suitable for clinical applications.
20	Mandloi et al., [74]	2023	Multimedia Tools and Applications .	SCIE IF 2.9 Scopus Cite Score 7.2	No	MRI	Conditional GAN,MobileNet, InceptionResNet, EfficientNet, and VGGNet,MobileNet	LRP	Detection and classification	Not specified	Not specified	Not specified	1.InceptionResNetV2 achieved training, validation, and testing accuracies of 99.6%, 99.2%, and 99.0%, respectively, for tumor detection. 2.EfficientNet-B0 achieved training, validation, and testing accuracies of 99.3%, 99.2%, and 99.0% during classification.	1.The use of InceptionResNetV2 for brain tumor detection and EfficientNet-B0 for classification yielded impressive results. 2.The integration of LRP provided clear explanations for the models' predictions. 3.Transfer learning using pre-trained InceptionResNetV2 and EfficientNet-B0 is highly effective for brain tumor detection and classification.	Kaggle:Brain MRI Images for Brain Tumor Detection Kaggle:Brain Tumor Classification	1.InceptionResNetV2 is computationally expensive. 2.Validation thorugh additional dataset is required. 2.Limited generalizability.	The Mandloi et al., [71] presents a highly effective approach to brain tumor detection and classification using the InceptionResNetV2 and EfficientNet-B0 models. Both models achieve impressive accuracy rates, showcasing their strong performance in handling medical imaging tasks. The integration of Layer-wise Relevance Propagation (LRP) adds significant value by enhancing the interpretability of t…
21	Yan et al., [75]	2023	Applied Sciences	SCIE IF 2.7 Scopus Cite Score 5.3	NO	MRI T1-weighted, T2-weighted , FLAIR, and T1ce	3D nnU-Net model	Grad Cam	Segmentation and Classification	Random gradient descent	Cross-entropy	Not specified	1.The nnU-Net model achieved high Dice Similarity Coefficients (ET: 0.79, WT: 0.91, TC: 0.85), demonstrating strong segmentation performance. 2.Classificationaccuracy of 95.46% with an F1-score of 90.73% and specificity of 98.32%.	1.The proposed framework demonstrated robust performance in segmenting and classifying brain tumors. 2.Use of Grad-CAM++, the framework provided visual heatmaps highlighting the regions of interest in MRI images.	BraTS 2018	1.Required significant computational resources 2.Framework heavily rely on the availability of large datasets. 3.Limited generalizability.	The Yan et al., [72] presents an advanced framework for brain tumor detection that combines segmentation, classification, and explainability. It improves heatmap accuracy to better explain its decisions. Trained on the BraTS-2018 dataset, the model excels in both performance and speed, enhancing understanding and trust in AI-driven tumor diagnosis.
22	Taşcı et al.,[76]	2023	Diagnostics	SCIE IF 3.1 Scopus Cite Score 4.7	NO	MRI	DenseNet201 and SVM	GradCAM	Classification	Bayesian optimization	Not specified	ReLU	The model achieved 98.65% accuracy on the Kaggle dataset and 99.97% on the Figshare dataset for brain tumor classification.	1.The paper presents a brain tumor detection model using XAI methods. 2.The integration of the Grad-CAM method provided clear visual explanations of model predictions. 3.By using 10-fold cross-validation, the model demonstrated robustness against overfitting, ensuring its reliability across multiple test runs​.	Kaggle: brain tumor dataset and Figshare brain tumor dataset	1.The study does not address the model's real-time applicability. 2.The paper highlights a high computational load.	The Taşcı et al.,[73] proposed an advanced brain tumor detection model utilizing XAI methods for faster and more accurate diagnosis. Using DenseNet201 for feature extraction and GradCAM for segmentation, the model was tested on two popular datasets, achieving impressive accuracy rates of 98.65% and 99.97%.
23	Özbay et al.,[77]	2023	Iran Journal of Computer Science	Springer	No	MRI	CNN based on mRMR,DarkNet53, EfficientNetB0, DenseNet201, ,SVM, KNN, and Ensemble algorithms	Grad-Cam	Detection	Stochastic Gradient Descen	Not specified	ReLU	The proposed model achieved a 99.6% accuracy rate in classifying brain tumor using the SVM classifier.	1.Grad-CAM was effectively used to provide visual explanations, enhancing the interpretability of the model’s predictions. 2.The mRMR feature selection method significantly optimized the feature set, reducing redundancy and improving classification performance.	Br35H 2020	1.Limited generalizability. 2.The proposed model focuses only on binary classification. 3.Additional validation is required. 4.Computationally intensive model.	The Özbay et al.,[74 ] introduces a hybrid deep learning model for brain tumor detection, combining features from CNNs (DarkNet53, EfficientNet-B0, DenseNet201) with mRMR optimization and Grad-CAM for explainability. The model achieves high accuracy (99.6%) using SVM and provides visual explanations to enhance interpretability.
24	Nair et al.,[ 78]	2023	Procedia Computer Science	Scopus Cite Score 4.5	NO	discharge summery	GBoost, Local Cascade Ensemble, Histogram-based gradient boosting, LightGBM, and CatBoost classifiers,	ELI5	Classification	Not specified	Not specified	Not specified	The study utilized XGB, LCE, HGB, LightGBM, and CatBoost classification algorithms, with XGB and CatBoost showing the best average F-scores.	1.The model effectively classifies three types of brain tumors using discharge summaries and NLP techniques. 2.Explainable AI, via the ELI5 tool, provides transparency in predictions, helping clinicians understand the model's decisions.	Discharge summaries of 422 patients NIMHANS hospitals Bangalore from 2013-2019.	1.Small Dataset 2.Missing Data Handling 3.Limited Dataset Scope	The Nair et al.,[ \75] presents a machine learning model for classifying brain tumors using discharge summaries and NLP techniques. It employs explainable AI with ELI5, making predictions transparent for clinicians. While the model handles missing data using algorithms like XGBoost and LightGBM, its small dataset and narrow focus limit broader applicability. Despite these limitations, the model s…
25	Ullah et al.,[79]	2023	International Journal of Imaging Systems and Technology	SCIE IF 3 Scopus Cite Score 6.9	NO	MRI	DeepEBTDNet	LIME	Detection	Stochastic Gradient Descent with Momentum	Softmax	ReLU	The DeepEBTDNet model achieved a validation accuracy of 98.96% and a testing accuracy of 94.0% for brain tumor detection, showcasing its efficacy across datasets.	1.The research findings of the paper highlight the successful development of the DeepEBTDNet model for brain tumor detection, achieving a validation accuracy of 98.96% and testing accuracy of 94.0% across datasets, emphasizing the importance of explainable AI in healthcare for transparent decision-making and early tumor identification.	BTDMRI database and the Brain MRI Images for BTD dataset.	1.The model is specifically designed for brain tumor detection and has not been validated on other types of medical images or conditions. 2.The study does not explicitly differentiate between benign and malignant tumors.	The Ullah et al.,[76] introduces DeepEBTDNet, a deep learning model for brain tumor detection using MRI images, with an emphasis on explainability via LIME. The model achieves high accuracy (98.96%) and provides visual explanations for predictions, addressing the black-box nature of AI. Strengths include its novel architecture and LIME-based transparency. However, limitations include reliance on …
26	Valerio et al.,[80]	2023	CEUR Workshop Proceedings journal.		NO	MRI T1-weighted, T2-weighted , FLAIR, and T1ce	U-Net Model,R-CNN, DeepLab V3,	FCN Grad-CAM, and SHAP	Segmentation	Not specified	pixel-wise cross-entropy loss	ReLU	1.The U-Net model achieved a 99% accuracy in segmenting brain tumors. 2.For survival prediction, with Random Forest achieving the best results with an accuracy of 64%.	1.The U-Net model achieved 99% accuracy in brain tumor segmentation using MRI images from the BraTS2020 dataset,. 2.SHAP was employed to explain the predictions of survival models.	BRATS 2020	1.Moderate Survival Prediction Accuracy 2.No Exploration of Advanced XAI Techniques 3.Validation through additional dataset is required.	The Valerio et al.,[77] presents a U-Net model for brain tumor segmentation, achieving 99% accuracy on the BraTS2020 dataset. Grad-CAM is used for visualizing key tumor regions, and SHAP explains survival predictions from models like Random Forest. While segmentation performance is excellent, survival prediction accuracy is moderate, with Random Forest at 64%.
27	Šefčík et al., [81]	2023	International Journal of Information Technology	Scopus Cite Score 6	No	T1-weighted and T2-weighted, and FLAIR	DNN	LRP, Grad Cam	Classification	Adam	LRPLoss	ReLU	The proposed method increased classification accuracy from 72% to 79%.	1.The proposed explanation-guided training method improved classification accuracy from 72% to 79% for glioma types. 2.More attention to relevant tumor areas in MRI images due to use of LRP. 3.The method provided clearer insights into the model's decision-making process.	BraTS 2020	1.Limited generalizability. 2.Model neglect other potentially relevant features in the MRI images that could contribute to classification.	The Šefčík et al., [78 ] proposed a explanation-guided training for glioma classification, using Layer-wise Relevance Propagation (LRP) to focus on tumor regions. The approach improves accuracy from 72% to 79% and enhances model interpretability, making it more effective for medical use.
28	Eder et al.,[82]	2023	BioMedInformatics	Scopus Cite Score 1.7	NO	MRI T1-weighted, T2-weighted , FLAIR, and T1ce	CNN	SHAP	Detection	Not specified	Not specified	Not specified	The CNN model trained on MRI data achieved up to 94% accuracy.	1.SHAP-based explanations improve the interpretability of CNN models for brain tumor survival prediction. 2.Models trained on scaled MRI data perform better, showing higher accuracy and reduced overfitting. 3.SHAP visualizations support model evaluation by enhancing transparency and aligning with clinical knowledge.	BraTS 2020	1.The lack of additional datasets, particularly for network validation. 2.optimization of network structures was not explored in-depth. 3.Limited generalizability.	The Eder et al.,[79] applied SHAP-based XAI techniques to make CNN models for brain tumor survival prediction more interpretable. Using MRI data from the BraTS 2020 dataset, the authors show that SHAP highlights key features influencing predictions, aiding model evaluation. The study enhances trust in AI for medical use but is limited by its reliance on a single dataset.
29	Sultan et al.,[83]	2023	Journal of King Saud University – Computer and Information Science	SCIE IF 5.2 Cite Score 10.5	NO	MRI	MDFU-Net	Grad-Cam	Segmentation	Stochastic Gradient Descent	weighted cross-entropy loss	ReLU	Heterogeneous Data: Dice Coefficient (DC): 62.66%, Intersection over Union (IoU): 56.96%, Specificity: 99.29%, Sensitivity: 51.98% Homogeneous Data: DC:82.96%, IoU: 74.94%, Specificity: 99.89%	1.MDFU-Net outperformed state-of-the-art methods in tumor segmentation, achieving a Dice coefficient of 62.66% on heterogeneous data and 82.96% on homogeneous data. 2.Introduced atrous blocks for capturing multiscale contextual information. 3.First study to comprehensively analyze heterogeneous brain data, with performance enhanced by preprocessing steps.	Data-1:8,798 MRI modalities from 20 patients. Data-2: 57,195 MRI modalities from 369 subjects.	1. Limited testing dataset. 2.Lack of cross-data analysis. 3.Low sensitivity in heterogeneous data.	This study[80] presents a unified weakly-supervised segmentation framework using UM-CAM for detailed pseudo-labels, GSE for boundary refinement, and RVC training for consistency. It significantly improves accuracy in 2D fetal brain and 3D brain tumor segmentation, offering a cost-effective solution for medical imaging.
30	Tang C et al.,[84]	2023	Journal of King Saud University – Computer and Information Science	SCIE IF 5.2 Cite Score 10.5	NO	MRI	GAM-SpCaNet	Grad-Cam	Classification	Gradient Awareness Minimization	Gradient ascent and descent	Swish	1.GAM-SpCaNet achieved 99.28% accuracy in brain tumor classification, surpassing eight SOTA CNN and Transformer models. 2.Lightweight design reduced parameters by over threefold. 3.Achieved 100% specificity, precision, recall, and F1-score for malignant tumors.	1.SpCaNet achieved 99.28% accuracy in brain tumor classification. 2.GAM significantly outperformed SGD in classification performance. 3.SpCaNet reduced parameters by over threefold compared to SOTA models. 4.Showed statistically significant improvements in precision and accuracy over SOTA models.	BraTS2019 dataset	1.Existing methods struggle with irregular tumor shapes and appearances. 2.Limitations in identifying tumor substructures and classifying images.	This study introduces SpCaNet[81], a lightweight model for brain tumor classification, achieving 99.28% accuracy with three times fewer parameters than existing models. It integrates Gradient Awareness Minimization (GAM) for better performance than traditional SGD, offering improved efficiency and generalization.
31	Keles et al.,[85]	2023	Irish Mahine Vision and Image Processing Conference 2023		NO	MRI	CNN	Radient-based saliency maps	Classification	Not specified	Not specified	ReLU	CNN model achieved 80% accuracy for classification.	1.Saliency maps reveal that the tumor regions and their shapes significantly influence the CNN model's classification of brain MRI images. 2.The generated saliency maps provide valuable insights into the decision-making process of the model.	BR35H 2020	1.The model struggles with accurately classifying tumors that have complex shapes. 2.Limited generalizability.	The Keles et al.,[82] explores the use of gradient-based saliency maps to improve the interpretability of CNN models for brain tumor classification using MRI images. The study demonstrates that tumor regions and their shapes play a significant role in the classification process, and saliency maps provide insights into the model's decision-making.
32	Brima et al., [86]	2024	BioData Mining.	SCIE IF 4 Scopus Cite Score 7.9	NO	MRI T1-weighted	VGG16, VGG19, ResNet50, ResNet50V2, InceptionV3, Xception, EfficientNetB0, DenseNet121, and InceptionResNetV2	Saliency maps	Detection	Stochastic Gradient Descent with Momentum	Not specified	Not specified	With the brain MRI dataset, the DenseNet121 model achieved 98.10% accuracy. While with COVID-19 X-ray dataset the hybrid InceptionResNetV2 outperformed the other models and achieved an accuracy of 89.0%.	The results showed that deep learning models can complement medical experts in efficiently detecting and diagnosing diseases from medical images, emphasizing the importance of interpretable saliency maps for deep CNNs in medical image analysis .	Figshare and the COVID-19 X-ray	1.Limited generalizability. 2.The Vanilla Gradient method and SmoothGrad produced noisy and less reliable saliency maps compared to XRAI. 3.No Quantitative Metrics for Explainability	The Brima et al., [83 ]used 9 standard CNN architecture for classifing COVID 19 X Ray images and brain tumors from T1 weighted MRI slices.This study evaluates the effectiveness of attribution techniques to explain model predictions and enhance transparency.Thier approach highlighted salient regions that contributed to model decisions, offering insights into potential biomarkers and uncovering mod…
33	Sarah et al., [87]	2024	Frontiers in Physiology	SCIE IF 3.2 Scopus Cite Score 6.5	NO	MRI	K-means++,SGLDM,VGG16 , VGG19,ResNet50	Grad Cam	Detection	Adam	Categorical cross entropy	ReLU	The proposed model achieved a training accuracy of 99.25% and a validation accuracy of 99.50%.	1.The proposed method achieved 99.25% training accuracy and 99.50% validation accuracy on the Br35H 2020 dataset. 2.The use of K-means++ clustering for segmentation provided accurate isolation of tumor regions. 3.Grad-CAM provided visual explanations for the model’s predictions	Kaggle's: Br35H 2020	1.Data Quality Sensitivity:The performance heavily depends on the quality of the input MRI images. 2.The approach requires significant computational resources. 3.Limited generalizability.	The Sarah et al., [84] proposed a brain tumor detection method using K-means++ segmentation, SGLDM feature extraction, and ResNet50 classification, achieving 99.50% accuracy on the Br35H 2020 dataset. Data augmentation and Grad-CAM enhance robustness and interpretability. The model outperforms VGG16 and VGG19.
34	Appiah et al.,[ 88]	2024	Computer Methods and Programs in Biomedicine	SCIE IF 4.9 Scopus Cite Score 12.3	NO	MRI	MobileNetV2, Inception-v3, ResNet101, VGG-19	SHAP	Detection	Adam	binary cross-entropy	ReLU	1.CNN predicted tumors with 99.21% accuracy, while POD-CNN achieved 95.88% accuracy with 1/3rd computational time. 2.MobileNetV2 delivered the highest accuracy of 99.82%, outperforming other models like Inception-v3 (99.63%), ResNet101 (99.00%), and VGG-19 (95.64%).	1.The POD-CNN model offers a balance between accuracy (92.78%) and computational efficiency. 2.Among the pre-trained models, MobileNetV2 stands out, achieving the highest accuracy of 99.82%. 3.The use of SHAP values enhances the model’s explainability, which is crucial for medical applications.	Brats 2018	1.The study focuses on binary classification only. 2.Limited generalizability. 3.The extensive pre-processing required.	The Appiah et al.,[ 85] proposes a method for brain tumor detection using Proper Orthogonal Decomposition (POD) with deep learning. It achieves high accuracy (99.82%) while reducing computational cost and enhances interpretability with SHAP values.
35	Nhlapho et al., [89]	2024	Information	ESCI IF 2.6 Scopus Cite Score 5.5	NO	MRI	EfficientNetB0, DenseNet121, Xception	Grad-CAM and Grad-CAM++.	Detection	Adam	Not specified	ReLU	1.EfficientNetB0 achieving 98% accuracy. 2.Grad-CAM and Grad-CAM++ highlighted critical image regions.	1.EfficientNetB0 achieved the highest classification accuracy of 98%, followed by DenseNet121 and Xception with accuracies of 97% and 96%, respectively. 2.Grad-CAM and Grad-CAM++ provided clear and accurate visual explanations of the model’s decisions.	Kaggle:sartajbhuvaji	1.The study primarily focuses on binary classification. 2.Models like VGG16 and VGG19 are computationally expensive.	The Nhlapho et al., [86] evaluates deep learning models for brain tumor detection from MRI images, with EfficientNetB0 achieving the highest accuracy (98%). Explainability techniques like Grad-CAM and Grad-CAM++ provided clear insights into the models' decisions, enhancing trust.
36	P. V. et al., [90]	2024	INTELLIGENT SYSTEMS AND APPLICATIONS IN ENGINEERING	Scopus Cite Score 1.3	NO	MRI	InceptionV3	LIME	Detection	Not specified	Not specified	ReLU	The model achieved high accuracy in detecting various brain conditions: Alzheimer's disease: 95% accuracy Brain tumor: 96.95% accuracy Multiple sclerosis: 96.21% accuracy	1.The framework achieved high accuracy rates for detecting various brain diseases from MRI scans. 2.The integration of LIME and Integrated Gradients allowed for clear visualizations.	FLAIR images for Alzheimer's disease, brain tumor images, and images for Multiple Sclerosis (MS) detection.	1.The InceptionV3 model requires substantial computational resources for training and inference. 2.The accuracy of the model heavily relies on the quality and diversity of the training data.	The P. V. et al., [87 ] introduced an explainable AI framework using the InceptionV3 model for detecting brain diseases from MRI scans. With high accuracy rates—Alzheimer's (95%), brain tumors (96.95%), and multiple sclerosis (96.21%)—it employs techniques like LIME for transparency.
37	Tehsin et al., [91]	2024	Big data and cognitive computing	ESCI IF 3.7 Scopus Cite Score 7.1	NO	MRI	DaSAM Based on CNN	2D Grad Cam	Detection	Adam	Categorical cross entropy	sigmoid	The proposed method achieved precision values of 99% and 96% on the Figshare and Kaggle datasets, respectively, for brain tumor detection.	1.The DaSAM model achieved precision values of 99% on the Figshare dataset and 96% on the Kaggle dataset. 2.The integration of Disease and Spatial Attention Modules (DAM and SAM) provides visual explanations by highlighting critical regions in MRI images.	Kaggle: Brain Tumor Classification (MRI) and Figshare brain tumor dataset.	1.Limited generalizability. 2.The model focuses on classification rather than precise tumor segmentation, 3.The authors mention an imbalance in the data distribution.	The Tehsin et al., [88] presented the DaSAM model, which combines Disease and Spatial Attention Modules to improve both accuracy and explainability in brain tumor classification from MRI images. The model achieves high precision (99% on Figshare, 96% on Kaggle) and provides visual explanations for its predictions.
38	Palkar et al., [92]	2024	IEEE Access	SCIE IF 3.9 Scopus Cite Score 9.8	NO	MRI	RF, DT, LR, KNN, Adaboost, SVM, Catboost, LGBM classifier, ANN and Xgboost	Four XAI strategies used are SHAP, Eli5, LIME, and Qlattice	Detection	Not specified	Not specified	ReLU	XGBoost achieved the highest accuracy (88%), with SHAP showing the most important features, including IDH1, Age at Diagnosis, PIK3CA, ATRX, and TP53.	1.The most significant predictive features identified were IDH1, Age at Diagnosis, PIK3CA, ATRX, PTEN, CIC, EGFR, and TP53. 2.XAI methods (SHAP, LIME, Eli5, QLattice) provided transparent insights into the model’s predictions, highlighting feature importance and enhancing trust.	MICCAI BraTS 2019 dataset	1.The model's performance is highly dependent on the quality and diversity of datasets. 2.Limited generalizability. 3.XAI methods QLattice demand significant computational power and time.	The Palkar et al., [89 ]used machine learning models like XGBoost (88% accuracy) to predict glioma progression, with key features like IDH1 and ATRX. It integrates XAI methods (SHAP, LIME, Eli5) to enhance interpretability, crucial for clinical use.
39	M. M et al., [93]	2024	BMC Medical Imaging	SCIE IF 2.9 Scopus Cite Score 4.6	NO	MRI	ResNet50	Grad-CAM	Detection	Adam	binary cross-entropy	ReLU	The model achieved a testing accuracy of 98.52% with precision and recall metrics exceeding 98%.	1.The ResNet50 + Grad-CAM model outperformed baseline models. 2.The model holds potential for clinical use, but further testing with larger, more diverse datasets is needed for validation in real-world settings.	Kaggle: Brain MRI Images for Brain Tumor Detection	1.Limited generalizability. 2.ResNet50 with 50 layers, requires substantial computational resources for training and inference.	The M. M et al., 90[] introduces an AI model using ResNet50 and Grad-CAM for brain tumor detection in MRI scans, achieving high accuracy (98.52%) with enhanced interpretability through visual heatmaps. Grad-CAM provides insight into the model’s focus areas.
40	Pasvantis et al., [94]	2024	Journal of Imaging	ESCI IF 3.0 Scopus Cite Score 5.9	NO	MRI	InceptionV3, ResNet50V2,NasNetLarge	LIME	Detection	Adam	Categorical cross entropy	Not specified	ResNet50V2 outperformed both InceptionV3 and NasNetLarge in terms of F1-scores, as confirmed by statistical tests (p = 0.02 for InceptionV3 and p = 0.008 for NasNetLarge).	1.The average tumor segment coverage improved from 32.41% to 50.28% after refinement using 3 segments. 2.The proposed refinement approach significantly enhanced the explainability of deep learning models.	Kaggle:Brain Tumor Dataset	1.Edge detection algorithms sometimes produce unreliable masks, affecting the refinement quality. 2.Limited generalizability.	The Pasvantis et al., [91] presents a novel method to enhance the explainability of deep learning models in brain tumor detection using post-heuristic refinements for LIME-generated explanations. It improves tumor segment coverage from 32.41% to 50.28%, with ResNet50V2 outperforming other models in accuracy. The use of 3 segments provided the best balance between informative and irrelevant areas.
41	Zeineldin et al.,[95]	2024	Scientific Reports	SCIE IF 3.8 Scopus Cite Score 7.5	YES	MRI T1-weighted, T2-weighted , FLAIR, and T1ce	CNN and Grad Cam	Grad-Cam	Segmentation	Stochastic Gradient Descent	categorical entropy	ReLU	The TransXAI model achieved a Dice Similarity Coefficient: Enhancing Tumor (ET): 0.745 Tumor Core (TC): 0.782 Whole Tumor (WT): 0.882	1.TransXAI uses a CNN for capturing local features and transformers to capture long-range dependencies. 2.The use of Grad-CAM provided visual interpretations of the model's decisions. 3.The analysis revealed that specific MRI modalities (T1Gd and T2) contributed significantly to the detection of tumor sub-regions.	BraTS 2019 and FeTS2022 datasets.	1.The current implementation focuses on 2D axial MRI slices. 2.The hybrid architecture may require significant computational resources.	The Zeineldin et al.,[92] introduces TransXAI, a hybrid deep learning model that combines CNNs and vision transformers for glioma segmentation in multimodal MRI scans. It achieves competitive performance, with Dice Similarity Coefficients of 0.745 for enhancing tumors and 0.882 for whole tumors, while providing explainability through Grad-CAM visualizations.
42	Rahman et al., [96]	2024	Computer Modeling in Engineering Sciences	SCIE IF 5.5 Scopus Cite Score 13.1	No	MRI	CNN	SHAP and Grad Cam++	Classification	AdamW, Adam, SGD, and RMSProp	Cross-entropy	GELU and SiLU	Proposed method achieved an impressive accuracy of 99.1569% using the GliomaCNN model integrated with the gradient-boosting algorithm .	T1.he proposed GliomaCNN model achieves 99.1569% accuracy in classifying brain tumors using BraTS 2020 dataset, outperforming other state-of-the-art models. 2.GliomaCNN is computationally efficient with fewer layers compared to other CNN models. 3.The integration of SHAP and Grad-CAM++ techniques provides transparent and interpretable predictions.	BraTS 2020	1.The dataset used is imbalanced. 2.Limited generalizability.	The Rahman et al., [93] presents GliomaCNN, a lightweight CNN model for classifying brain tumors from MRI scans, achieving an impressive 99.1569% accuracy. It effectively distinguishes between Low-Grade and High-Grade Gliomas using the BraTS 2020 dataset. The model incorporates Explainable AI methods like SHAP and Grad-CAM++, enhancing its transparency by identifying key regions influencing predi…
43	Mutkule et al.,[97]	2024	Journal of Autonomous Intelligence	Scopus CiteScore 0.6	NO	histopathological images	hybrid spatio-temporal attention-based ResUNet,foraging gyps africanus optimization (FGAO)	SHAP	Segmentation	FGAO algorithm	Not specified	Not specified	The proposed model achieved high accuracy (95.75%), sensitivity (95.10%), and specificity (96.32%).	1.The model achieves 95.75% accuracy, 95.10% sensitivity, and 96.32% specificity in brain tumor mapping using histopathological images. 2.The hybrid Spatio-Temporal Attention-based ResUNet improves the accuracy and robustness of tumor segmentation, even with low-quality images.	TCGA dataset	1.The model relies heavily on high-quality histopathological images. 2.The model focuses on two tumor classes. 3.Limited generalizability.	The Mutkule et al.,[94] introduced a distributed optimizer-tuned explainable AI (XAI) classifier for brain tumor mapping, using a hybrid Spatio-Temporal Attention-based ResUNet for segmentation and the Foraging Gyps Africanus Optimization (FGAO) algorithm for parameter tuning. It achieves high accuracy (95.75%) and improves model explainability with SHAP and Grad-CAM++.
44	Haque et al.,[98]	2024	Scientific Reports	SCIE IF 3.8 Scopus Cite Score 7.5	NO	MRI	VGG19	Inverted Pyramid Pooling Module and LIME	Classification	Adam	Not specified	Softmax and ReLU	NeuroNet19 achieved the highest accuracy of 99.3% with precision, recall, and F1 scores at 99.2% and a Cohen Kappa coefficient of 99% .	1.The incorporation of the Inverted Pyramid Pooling Module (iPPM) allows the model to capture multi-scale features. 2.The model reports a Cohen Kappa coefficient of 99%, indicating a strong agreement between the model's predictions and the actual classifications. 3.NeuroNet19 has significant potential for real-world applications in medical diagnostics.	Figshare, the SARTAJ dataset, Br35H, BRATS 2020	1.The performance of NeuroNet19 relies heavily on pre-processing steps.	The Haque et al.,[95] introduces NeuroNet19, an explainable deep neural network for classifying brain tumors from MRI images, achieving 99.3% accuracy. Utilizing the Inverted Pyramid Pooling Module (iPPM) enhances multi-scale feature extraction, improving tumor detection. The model's transparency is bolstered by LIME, offering insights into its decision-making. NeuroNet19 outperforms several exis…
45	Saeed et al., [99 ]	2024	Journal of Neuroscience Methods	SCIE IF 2.7 Scopus Cite Score 9.5	NO	MRI	DeepLabV3, ResNet18, DarkNet53, MobileNetV2 ,SVM	Grad-CAM	Segmentation and Classification	Bayesian optimization	Not specified	Not specified	The proposed model achieved 97% classification accuracy and 0.98 global accuracy in segmentation tasks.	1.Utilizing the DeepLabV3+ architecture optimized through Bayesian methods significantly enhanced the model's ability to segment brain tumors. 2.The integration of Grad-CAM provided valuable insights into the model's decision-making process.	Brats 2021	1.Limited generalizability. Increased computational load, making the 2.model resource-intensive.	The Saeed, et al., [96 ] introduces a Neuro-XAI deep learning framework using DeepLabV3+ for brain tumor segmentation and classification, achieving 97% accuracy. It enhances interpretability through Bayesian optimization for hyperparameter tuning and Grad-CAM for explainability. Additionally, it quantifies uncertainty with confusion entropy, addressing critical aspects of AI in healthcare.
46	Bhuvaneswari et al.,[100]	2024	Informatics in Medicine Unlocked	Scopus CiteScore 9.5	No	MRI	InceptionV3, ResNet-50, VGG16, DenseNet	LRP	Classification	oneDNN	Not specified	ReLU	ResNet-50 achieved the highest accuracy (95.5%) with superior efficiency, followed by DenseNet (94.65%) and VGG16 (91.04%)	1.The hybrid CNN architecture demonstrated strong performance. Optimization through oneAPI enhanced the computational efficiency of the models. 2.The use of LRP in the hybrid architecture added an explainability layer to the model.	TCGA LGG Dataset	1.Limited generalizability. 2.The model's performance heavily depends on the quality and diversity of the training dataset. 3.The model lacks comprehensive clinical validation.	The Bhuvaneswari et al.,[97] presents a hybrid CNN architecture combining ResNet-50, DenseNet, VGG16, and InceptionV3 for brain tumor classification, optimized with oneAPI to improve computational efficiency. Achieving an accuracy of 95.5% with ResNet-50, the model excels in balancing accuracy and resource usage. It uses explainable AI techniques to enhance transparency in decision-making.
47	Nag et al.,[101]	2024	IEEE Access	SCIE IF 3.9 Scopus Cite Score 9.8	NO	MRI	ResNet50,Generative Adversarial Networks	LIME	Classification	Adam	binary cross-entropy	ReLU	The proposed model, TumorGANet, achieved exceptional results with an accuracy of 99.53%, precision and recall rates of 100%, F1-scores of 99%, and a Hamming loss of 0.2%.	1.TumorGANet achieved exceptional performance. 2.By utilizing GANs, the model could generate realistic synthetic MRI data. 3.The study incorporated LIME, which enhanced the transparency of the model.	Kaggle: Brain Tumor MRI dataset	1.Limited generalizability. 2.There is a risk that the GAN-generated data could introduce artifacts or features that do not accurately represent real tumors.	The Nag et al.,[98] proposed a TumorGANet brain tumor classification model using transfer learning and Generative Adversarial Networks (GANs) for data augmentation. It achieves an impressive 99.53% accuracy, leveraging ResNet-50 for feature extraction and VGG-16 for classification. The integration of LIME enhances model transparency by explaining predictions.
48	Hassan et al.,[102]	2024	Neurocomputing.	SCIE IF 5.5 Scopus Cite Score 13.1	NO	MRI T1-weighted, T2-weighted , FLAIR, and T1ce	-	NSL	Segmentation	Stochastic gradient descent with Nesterov momentum	Not specified	Not specified	It introduces the concept of neuro-symbolic learning as a solution to enhance the interpretability and explainability of artificial intelligence in clinical practices, particularly in brain tumor segmentation .	1.NSL is proposed as a hybrid approach that combines neural networks with symbolic AI. 2.By incorporating domain knowledge and clinical guidelines, NSL-based systems can enhance the explainability and trustworthiness of AI models.	Dataset source is not mentioned.	1.Paper proposed a strong case for NSL, it remains theoretical. 2.Dataset source is not mentioned.	The Hassan et al.,[99 ] introduced neuro-symbolic learning (NSL) as a promising solution to improve model transparency by combining neural networks with symbolic reasoning. The authors emphasize the need for explainable AI in medical diagnostics, advocating for models that not only provide accurate results but also explain their decisions.
49	Nazir et al., [103]	2024	Heliyon	SCIE IF 3.4	NO	MRI	Customised CNN	SHAP, LIME, and GRAD-CAM	Detection	Not specified	sigmoid function	ReLU	The model achieves excellent performance, with 100% accuracy, recall, and validation accuracy of 99.67%. The F1-score is 99.63%, demonstrating a highly reliable model for brain tumor detection..	1.The customized CNN model demonstrated excellent performance in detecting brain tumors from MRI images. 2.The integration of three XAI techniques—SHAP, LIME, and Grad-CAM—proved successful in making the model's predictions transparent and interpretable.	Kaggle: BR35H 2020	1.Small dataset size. 2.Limited generalizability. 3.Focuses only on binary classification.	The Nazir et al., 100[] presented a highly accurate CNN model integrated with XAI techniques (SHAP, LIME, Grad-CAM) to detect brain tumors from MRI images. It achieves near-perfect accuracy and offers transparent decision-making insights for medical diagnostics.
50	Hossain et al.,[104]	2024	IEEE JOURNAL OF BIOMEDICAL AND HEALTH INFORMATICS	SCIE IF 6.7 Scopus Cite Score 13.6	NO	MRI	ResNet-18 with support vector machines (SVMs) and GoogleNet with SVMs, VGG16, InceptionV3, ResNet50, and ViT models,	LIME	Classification	Adam	Not specified	Softmax	The proposed IVX16 ensemble model achieves the highest classification accuracy of 96.94%, outperforming individual TL models like VGG16, InceptionV3, and Xception.	1. IVX16 ensemble better performance across all tumor types, particularly in classifying gliomas and pituitary tumors. 2.The integration of LIME provided valuable insights into model predictions, allowing for better understanding of tumor localization.	Kaggle:Brain Tumor Classification(sartajbhuvaji)	1.Limited generalizability. 2.Increased computational requirements.	The Hossain et al.,[101] introduces the IVX16 ensemble model, which combines VGG16, InceptionV3, and Xception for brain tumor classification from MRI images, achieving 96.94% accuracy. It outperforms various transfer learning models and highlights the importance of explainability using LIME to enhance trust in AI diagnostics.
51	Mzoughi et al.,[ 105]	2024	The Visual Computer	SCIE IF 3 Scopus Cite Score 5.8	NO	MRI	ViT,CNN	Grad-CAM, LIME, and SHAP	Classification	Adam	Not specified	GELU	ViT achieved a higher classification accuracy (91.61%) compared to CNN (83.37%), making it more effective for the multi-classification task of brain tumors.	1.ViT's self-attention mechanism effectively captured both global and local dependencies in MRI images. 2.The use of Grad-CAM, LIME, and SHAP provided interpretability, allowing clinicians to visualize important image regions influencing model decisions. 3.ViT performed better across all tumor classes, especially for meningiomas and pituitary tumors.	Figshare Dataset	1.Limited generalizability. 2.The ViT model is more accurate, but has higher computational demands than the CNN.	The Mzoughi et al.[102 ] compares Vision Transformers (ViT) and CNNs for brain tumor classification using MRI images, with ViT achieving a higher accuracy of 91.61% compared to CNN's 83.37%. ViT's self-attention mechanism enhances feature extraction, and explainable AI techniques like Grad-CAM, LIME, and SHAP improve interpretability.
52	Amin et al.,[107]	2024	IEEE Transactions on Consumer Electronics.	SCIE 4.3 Cite Score 7.7	NO	MRI	Inception-v3, DenseNet201	LIME and Grad Cam	Detection	Adam	Not specified	ReLU	1.The framework achieves a high classification accuracy of 96% on brain tumor MRI images. 2.LIME and Grad-CAM are effectively used to provide visual explanations of the AI’s decision-making	1.Integrating physics-based constraints with deep learning improves both the interpretability and reliability of the model’s predictions. 2.The use of LIME and Grad-CAM provides clear visual explanations of the AI’s decision-making process.	Kaggle:Brain Tumor MRI Dataset	1.Limited generalizability. 2.The integration PIDL and explainability techniques like LIME and Grad-CAM adds computational complexity.	The Amin et al.,[ 103] introduces an XAI-empowered MRI analysis framework using Physics-Informed Deep Learning (PIDL) with LIME and Grad-CAM for brain tumor diagnostics, achieving 96% accuracy. It enhances interpretability but is limited by dataset generalization and computational complexity. The framework shows potential for broader medical applications in consumer healthcare.
53	Jia Fu et al.,[108]	2024	Pattern Recognition	SCIE IF 7.5 Cite Score 14.4	Yes	MRI	UM-CAM	CAM	Segmentation	Stochastic Gradient Descent	Cross Entropy and Kullback-Leibler divergence	Not specified	1.The proposed method outperformed existing weakly-supervised methods. 2. Average DSC for FB dataset reached 90.87. 3.Average DSC for BraTS dataset reached 85.44.	1.UM-CAM generates high-quality pixel-level pseudo-labels. 2.GSE and RVC strategies enhance boundary clarity and consistency. 3.Achieved superior results in weakly-supervised fetal brain and brain tumor segmentation.	Fetal brain segmentation dataset	1.Current methods struggle with noisy pseudo-labels, treating them as fully accurate. 2.Handling object boundaries remains challenging for uncertainty-based approaches. 3.Noisy or ambiguous labels lead to higher training loss. 4.Adding extra networks makes training more complicated.	This paper introduces[104] a new approach for weakly-supervised medical image segmentation, aiming to improve the accuracy of segmentation from image-level labels. The method uses UM-CAM to generate high-quality pseudo-labels, applies GSE to refine boundaries, and employs a RVC strategy to improve consistency and handle noisy data. Experiments on 2D fetal brain and 3D brain tumor segmentation sho…

## Sheet: Table 2
Ref.	Year	Imaging Modality	Methods	XAI	Task	Optimizer	Loss Function	Activation Function	Dataset	limitations
[55]	2017	MRI	CNN	Grad Cam	D	NA	NA	ReLU	PASCAL VOC 2007 and ImageNet	1.Grad-CAM relies on the gradients flowing into the last convolutional layer of a CNN. 2.Limited to CNN only.
[57]	2018	MRI	CNN	PG CAM	D	Adam	Softmax	ReLU	image dataset of 550 patients.	1.Precision and accuracy for tumor localization are still relatively low. 2.The model relies on weakly supervised learning using image-level annotations rather than pixel-wise. 3.The dataset used for training has a high class imbalance.
[58]	2019	T2 Weighted MRI	DL-CNN	CAM	D and C	Adam	Categorical cross entropy	ReLU	41 subjects with IDH1 mutant genotype and 30 subjects with wild-type IDH1 genotype	1.Dependence on T2-weighted MRI. 2.Limited sample size. 3.The author did not mention external validation on independent datasets.
[61]	2020	MRI T1-weighted, T2-weighted	Resnet50, and Bayesian neural network	Grad-CAM	D	NA	NA	NA	TCGA-GBM	1.The model showed a tendency to focus on irrelevant areas. 2.The MRI data used for training came from different views and acquisition sequences. 3.Limited Generalizability.
[62]	2021	MRI T1-weighted, T2-weighted, and FLAIR	DenseNet-121, GoogLeNet, and MobileNet,	Grad-CAM	D	Adam	NA	NA	TCGA CIA	1.A significant number of tumor brains were incorrectly classified. 2.Grad-CAM struggled with complex images containing multiple objects. 3.The study used limited patient data.
[66]	2022	MRI	CNN	LIME,SHAP	D	Adam	NA	ReLU	Kaggle:sartajbhuvaji	1.The proposed dual-input CNN model faces challenges when dealing with low-quality MRI images. 2.Limited generalizability.
[68]	2022	MRI	MobileNetV2, Multiclass SVM	Grad Cam	D	Adam	Cross-entropy	ReLU	Figshare and BraTS 2018	1.Time-consuming feature selection method. 2.The approach was only tested on 2D MRI images. 3.High computational resources are required for processing.
[69]	2022	MRI T1-weighted, T2-weighted , FLAIR, and T1ce	CNN	numGrad Cam	D and C	NA	NA	ReLU	BRATS 2017 .	1.Limited generalizability. 2.There is a need for further validation. 3.The model requires significant computational resources.
[70 ]	2023	MRI	VGG-19, scratch VGG-19,	CAM, Grad-CAM, and Grad-CAM++	D and C	NA	NA	NA	Kaggle:Brain MRI Images for Brain Tumor D Kaggle:Brain Tumor C	1.Extensive computational resources and time is required. 2.Pre-trained models rely heavily on external datasets like ImageNet for transfer learning.
[71]	2023	MRI	lightweight CNN with Grad-CAM	Grad-CAM	D	Adam	Categorical cross entropy	ReLU	Figshare	1.Validation thorugh additional dataset is required. 2.Limited generalizability. 3.Dependence on MRI Imaging.
[74]	2023	MRI	Conditional GAN,MobileNet	LRP	D and C	NA	NA	NA	Kaggle:Brain MRI Images for Brain Tumor D Kaggle:Brain Tumor C	1.InceptionResNetV2 is computationally expensive. 2.Validation thorugh additional dataset is required. 2.Limited generalizability.
[77]	2023	MRI	CNN based on mRMR,DarkNet53, Ensemble algorithms	Grad-Cam	D	Stochastic Gradient Descen	NA	ReLU	Br35H 2020	1.Limited generalizability. 2.The proposed model focuses only on binary C. 3.Additional validation is required. 4.Computationally intensive model.
[79]	2023	MRI	DeepEBTDNet	LIME	D	Stochastic Gradient Descent with Momentum	Softmax	ReLU	BTDMRI database and the Brain MRI Images for BTD dataset.	1.The model is specifically designed for brain tumor D and has not been validated on other types of medical images or conditions. 2.The study does not explicitly differentiate between benign and malignant tumors.
[82]	2023	MRI T1, T2 , FLAIR, and T1ce	CNN	SHAP	D	NA	NA	NA	BraTS 2020	1.The lack of additional datasets, particularly for network validation. 2.optimization of network structures was not explored in-depth. 3.Limited generalizability.
[86]	2024	MRI T1-weighted	VGG16, VGG19, ResNet50, ResNet50V2	Saliency maps	D	Stochastic Gradient Descent with Momentum	NA	NA	Figshare and the COVID-19 X-ray	1.Limited generalizability. 2.The Vanilla Gradient method and SmoothGrad produced noisy and less reliable saliency maps compared to XRAI. 3.No Quantitative Metrics for Explainability
[87]	2024	MRI	K-means++,SGLDM,VGG16 , VGG19,ResNet50	Grad Cam	D	Adam	Categorical cross entropy	ReLU	Kaggle's: Br35H 2020	1.Data Quality Sensitivity:The performance heavily depends on the quality of the input MRI images. 2.The approach requires significant computational resources. 3.Limited generalizability.
[88]	2024	MRI	MobileNetV2, Inception-v3, ResNet101, VGG-19	SHAP	D	Adam	binary cross-entropy	ReLU	Brats 2018	1.The study focuses on binary C only. 2.Limited generalizability. 3.The extensive pre-processing required.
[89]	2024	MRI	EfficientNetB0, DenseNet121, Xception	Grad-CAM and Grad-CAM++.	D	Adam	NA	ReLU	Kaggle:sartajbhuvaji	1.The study primarily focuses on binary C. 2.Models like VGG16 and VGG19 are computationally expensive.
[90]	2024	MRI	InceptionV3	LIME	D	NA	NA	ReLU	FLAIR images for Alzheimer's disease, brain tumor images, and images for Multiple Sclerosis (MS) D.	1.The InceptionV3 model requires substantial computational resources for training and inference. 2.The accuracy of the model heavily relies on the quality and diversity of the training data.
[91]	2024	MRI	DaSAM Based on CNN	2D Grad Cam	D	Adam	Categorical cross entropy	sigmoid	Kaggle: Brain Tumor C (MRI) and Figshare brain tumor dataset.	1.Limited generalizability. 2.The model focuses on C rather than precise tumor segmentation, 3.The authors mention an imbalance in the data distribution.
[92]	2024	MRI	RF, DT, LR, KNN, Adaboost, SVM, Catboost, LGBM classifier, ANN and Xgboost	Four XAI strategies used are SHAP, Eli5, LIME, and Qlattice	D	NA	NA	ReLU	MICCAI BraTS 2019 dataset	1.The model's performance is highly dependent on the quality and diversity of datasets. 2.Limited generalizability. 3.XAI methods QLattice demand significant computational power and time.
[93]	2024	MRI	ResNet50	Grad-CAM	D	Adam	binary cross-entropy	ReLU	Kaggle: Brain MRI Images for Brain Tumor D	1.Limited generalizability. 2.ResNet50 with 50 layers, requires substantial computational resources for training and inference.
[94]	2024	MRI	InceptionV3, ResNet50V2,NasNetLarge	LIME	D	Adam	Categorical cross entropy	NA	Kaggle:Brain Tumor Dataset	1.Edge D algorithms sometimes produce unreliable masks, affecting the refinement quality. 2.Limited generalizability.
[103]	2024	MRI	Customised CNN	SHAP, LIME, and GRAD-CAM	D	NA	sigmoid function	ReLU	Kaggle: BR35H 2020	1.Small dataset size. 2.Limited generalizability. 3.Focuses only on binary C.
[107]	2024	MRI	Inception-v3, DenseNet201	LIME and Grad Cam	D	Adam	NA	ReLU	Kaggle:Brain Tumor MRI Dataset	1.Limited generalizability. 2.The integration PIDL and explainability techniques like LIME and Grad-CAM adds computational complexity.

## Sheet: Table 4
Ref.	Year	Imaging Modality	ML/DL/TF	XAI	Task	Optimizer	LF	AF	Dataset	limitations
[56]	2018	MRI	CNN	Grad Cam	C	Adam	Cross-entropy	ReLU	BRATS 2017	1.The model's performance is highly reliant on the availability of well-annotated MRI datasets. 2.Limited genelaizability. 3.Risk of overfitting due to the small size of the dataset used for training.
[58]	2019	T2 Weighted MRI	DL-CNN	CAM	D and C	Adam	Categorical cross entropy	ReLU	41 subjects with IDH1 mutant genotype and 30 subjects with wild-type IDH1 genotype	1.Dependence on T2-weighted MRI. 2.Limited sample size. 3.The author did not mention external validation on independent datasets.
[60]	2020	MRI	DT,NB,LR,NN,SVM,KNN	Grad-CAM	C	NA	NA	NA	Dataset of 3064 head images with glioma, meningioma, and pituitary tumors.	1.The success of the framework relies heavily on the feature extraction process. 2.Trade-off between Accuracy and Interpretability. 3.Limited Generalizability.
[64]	2022	MRI T1, T2 ,FLAIR, and T1ce	CNN,	Grad Cam and SHAP	C	NA	NA	NA	BraTS 2020	1.Current XAI Algorithms Are Not Clinically Designed. 2.Most XAI algorithms struggle to highlight the importance of different imaging modalities, such as T1, T2, or FLAIR.
[67]	2022	MRI and WSI	DenseNet, ResNet	Grad-Cam	C	NA	NA	NA	MRI sequences and WSI	1.Source of dataset is not mentioned. 2.Limited generalizability. 3.The tool currently supports a limited number of imaging modalities.
[69]	2022	MRI T1, T2 ,FLAIR, and T1ce	CNN	numGrad Cam	D and C	NA	NA	ReLU	BRATS 2017 .	1.Limited generalizability. 2.There is a need for further validation. 3.The model requires significant computational resources.
[70]	2023	MRI	VGG-19, scratch VGG-19,	CAM, Grad-CAM, and Grad-CAM++	D and C	NA	NA	NA	Kaggle:Brain MRI Images for Brain Tumor Detection Kaggle:Brain Tumor Classification	1.Extensive computational resources and time is required. 2.Pre-trained models rely heavily on external datasets like ImageNet for transfer learning.
[73]	2023	MRI	EfficientNetB0	LIME and SHAP	C	NA	NA	NA	Kaggle:Brain MRI Images for Brain Tumor Detection	1.Validation through addditional dataset is required. 2.Limited generalizability. 3.The model focuses solely on MRI images. 4. Further experimentation on multi-modal MRI-guided neurosurgery
[74]	2023	MRI	Conditional GAN,MobileNet, InceptionResNet, EfficientNet, and VGGNet,MobileNet	LRP	D and C	NA	NA	NA	Kaggle:Brain MRI Images for Brain Tumor Detection Kaggle:Brain Tumor Classification	1.InceptionResNetV2 is computationally expensive. 2.Validation thorugh additional dataset is required. 2.Limited generalizability.
[76]	2023	MRI	DenseNet201 and SVM	GradCAM	C	Bayesian optimization	NA	ReLU	Kaggle: brain tumor dataset and Figshare brain tumor dataset	1.The study does not address the model's real-time applicability. 2.The paper highlights a high computational load.
[78]	2023	discharge summery	GBoost, Local Cascade Ensemble, Histogram-based gradient boosting, LightGBM, and CatBoost classifiers	ELI5	C	NA	NA	NA	Discharge summaries of 422 patients NIMHANS hospitals Bangalore from 2013-2019.	1.Small Dataset 2.Missing Data Handling 3.Limited Dataset Scope
[81]	2023	MRI T1, T2 ,FLAIR, and T1ce	DNN	LRP, Grad Cam	C	Adam	LRPLoss	ReLU	BraTS 2020	1.Limited generalizability. 2.Model neglect other potentially relevant features in the MRI images that could contribute to classification.
[84]	2023	MRI	GAM-SpCaNet	Grad-Cam	C	Gradient Awareness Minimization	Gradient ascent and descent	Swish	BraTS2019 dataset	1.Existing methods struggle with irregular tumor shapes and appearances. 2.Limitations in identifying tumor substructures and classifying images.
[85]	2023	MRI	CNN	Radient-based saliency maps	C	NA	NA	ReLU	BR35H 2020	1.The model struggles with accurately classifying tumors that have complex shapes. 2.Limited generalizability.
[96]	2024	MRI	CNN	SHAP and Grad Cam++	C	AdamW, Adam, SGD, and RMSProp	Cross-entropy	GELU and SiLU	BraTS 2020	1.The dataset used is imbalanced. 2.Limited generalizability.
[98]	2024	MRI	VGG19	Inverted Pyramid Pooling Module and LIME	C	Adam	NA	Softmax and ReLU	Figshare, the SARTAJ dataset, Br35H, BRATS 2020	1.The performance of NeuroNet19 relies heavily on pre-processing steps.
[100]	2024	MRI	InceptionV3, ResNet-50, VGG16, DenseNet	LRP	C	oneDNN	NA	ReLU	TCGA LGG Dataset	1.Limited generalizability. 2.The model's performance heavily depends on the quality and diversity of the training dataset. 3.The model lacks comprehensive clinical validation.
[101]	2024	MRI	ResNet50,Generative Adversarial Networks	LIME	C	Adam	binary cross-entropy	ReLU	Kaggle: Brain Tumor MRI dataset	1.Limited generalizability. 2.There is a risk that the GAN-generated data could introduce artifacts or features that do not accurately represent real tumors.
[104]	2024	MRI	ResNet-18 with SVMs)and GoogleNet with SVMs, VGG16, InceptionV3, ResNet50, and ViT models,	LIME	C	Adam	NA	Softmax	Kaggle:Brain Tumor Classification(sartajbhuvaji)	1.Limited generalizability. 2.Increased computational requirements.
[ 105]	2024	MRI	ViT,CNN	Grad-CAM, LIME, and SHAP	C	Adam	NA	GELU	Figshare Dataset	1.Limited generalizability. 2.The ViT model is more accurate, but has higher computational demands than the CNN.
[101]	2024	MRI	ViT,CNN	Grad-CAM, LIME, and SHAP	C	Adam	NA	GELU	Figshare Dataset	1.Limited generalizability. 2.The ViT model is more accurate, but has higher computational demands than the CNN.

## Sheet: Table 3
Ref.	Year	Imaging Modality	ML/DL/TF	XAI	Task	Optimizer	Loss Function	Activation Function	Dataset	limitations
[59]	2020	MRI	SimUnet, ResNet,DenseUnit With Grad Cam	Grad Cam	S	NA	NA	NA	BRATS 2018	1.Validation thorugh additional dataset is required. 2.Limited generalizability. 3.The study focuses on 2D models due to the challenge of analyzing and visualizing interpretability metrics in 3D models.
[63]	2021	MRI T1-weighted, T2-weighted , FLAIR, and T1ce	DMFNet,Guided Backpropagation (GB)	Grad-CAM	S	NA	Dice loss	ReLU	BraTS-2018	1.The model sometimes failed to predict specific tumor regions. 2.Limited generalizability. 3.The T1-weighted sequence was found to be the least useful in tumor S compared to FLAIR, T1ce, and T2 sequences
[65]	2022	MRI native T1W, Gadolinium T1Gd, T2W, and FLAIR	ResNet-50,3D DeepSeg,Vanilla gradient, guided backpropagation,	Integrated gradients, Guided integrated gradients, SmoothGrad, Grad-CAM, and guided Grad-CAM.	S and C	Adam	NA	NA	BraTS 2019 and 2021	1.Lack of Interpretability in Deep Learning Models. 2.Current explainability methods struggle to effectively interpret complex multi-modal MRI data. 3.Many existing XAI methods are focused on 2D MRI slices.
[72]	2023	MRI T1-weighted, T2-weighted , FLAIR, and T1ce	Neural ODE, U-Net and Cascaded U-Net	Neural Ordinary Differential Equation (ODE) model	S	Adam	NA	Sigmoid	BraTS 2020	1.Validation thorugh additional dataset is required. 2.Limited generalizability. 3.Model requires significant computational resources. 4.The model is based on 2D MRI slices rather than full 3D volumes.
[75]	2023	MRI T1-weighted, T2-weighted , FLAIR, and T1ce	3D nnU-Net model	Grad Cam	S and C	Random gradient descent	Cross-entropy	NA	BraTS 2018	1.Required significant computational resources 2.Framework heavily rely on the availability of large datasets. 3.Limited generalizability.
[80]	2023	MRI T1-weighted, T2-weighted , FLAIR, and T1ce	U-Net Model,R-CNN, DeepLab V3,	FCN Grad-CAM, and SHAP	S	NA	pixel-wise cross-entropy loss	ReLU	BRATS 2020	1.Moderate Survival Prediction Accuracy 2.No Exploration of Advanced XAI Techniques 3.Validation through additional dataset is required.
[83]	2023	MRI	MDFU-Net	Grad-Cam	S	Stochastic Gradient Descent	weighted cross-entropy loss	ReLU	Data-1:8,798 MRI Data-2: 57,195 MRI	1. Limited testing dataset. 2.Lack of cross-data analysis. 3.Low sensitivity in heterogeneous data.
[95]	2024	MRI T1-weighted, T2-weighted , FLAIR, and T1ce	CNN and Grad Cam	Grad-Cam	S	Stochastic Gradient Descent	categorical entropy	ReLU	BraTS 2019 and FeTS2022	1.The current implementation focuses on 2D axial MRI slices. 2.The hybrid architecture may require significant computational resources.
[97]	2024	histopathological images	hybrid spatio-temporal attention-based ResUNet,foraging gyps africanus optimization (FGAO)	SHAP	S	FGAO algorithm	NA	NA	TCGA dataset	1.The model relies heavily on high-quality histopathological images. 2.The model focuses on two tumor classes. 3.Limited generalizability.
[99 ]	2024	MRI	DeepLabV3, ResNet18, DarkNet53, MobileNetV2 ,SVM	Grad-CAM	S and C	Bayesian optimization	NA	NA	Brats 2021	1.Limited generalizability. Increased computational load, making the 2.model resource-intensive.
[102]	2024	MRI T1, T2 ,FLAIR, and T1ce	-	NSL	S	SGD with Nesterov momentum	NA	NA	Dataset source is not mentioned.	1.Paper proposed a strong case for NSL, it remains theoretical. 2.Dataset source is not mentioned.
[108]	2024	MRI	UM-CAM	CAM	S	SGD	Cross Entropy and Kullback-Leibler divergence	NA	Fetal brain S dataset	1.Current methods struggle with noisy pseudo-labels, treating them as fully accurate. 2.Handling object boundaries remains challenging for uncertainty-based approaches. 3.Noisy or ambiguous labels lead to higher training loss. 4.Adding extra networks makes training more complicated.

## Sheet: Complete Review Results
Year	Count
2017	1										SCIE and Scopus	33		Publication Index Analysis	SCIE and Scopus	SCIE	Scopus	Conference / Book/Archive.org	IEEEXplore
2018	2										SCIE	3		Count	33	3	6	7	4
2019	1										Scopus	6
2020	3										Conference / Book/Archive.org	7
2021	2										IEEEXplore	4
2022	6											53
2023	16
2024	22
	53
	Code Availabe	Yes	No								Indexed(Scopus/SCI/ESCI)	Yes	NO
		9	44									43	10
	XAI Method	GradCam/Varient	LRP	LIME	SHAP	ELi5	Saliency maps	Others
	Count	34	2	11	11	2	2	4
	Task	Detection	Segmentation	Classification
	Count	24	12	21
	Datasets	BRATES 2017	BRATES 2018	BRATES 2019	BRATES 2020	BRATES 2021	BR35H	Kaggle	Figshare	TCGA	Others.
	Count	2	4	3	6	2	2	8	4	2	7
	Optimizers	Count
	Adam	22
	SGD	8
	Random Gradient descent	1
	Bayesian optimization	1
	Not Specified	18
	Others	4
	Loss Function	Count
	Cross entropy	6
	Softmax	2
	Categorical cross entropy	5
	Binary cross entropy	3
	Sigmoid function	1
	Others	6
	Not specified	30
	Activation Function	Count
	ReLU	28
	Sigmoid	2
	Other	3
	Not specified	20
